# 1 Priority effects and non-hierarchical competition shape 2 species composition in a complex grassland community

3 Lawrence H. Uricchio<sup>1†</sup>, S. Caroline Daws<sup>1</sup>,  
Erin R. Spear<sup>1,2</sup>, Erin A. Mordecai<sup>1†</sup>

4 <sup>1</sup>Department of Biology, Stanford University, Stanford, CA

5 <sup>2</sup>Current address: Biology Department, Regis University, Denver, CO

6 <sup>†</sup>To whom correspondence should be addressed: emordeca@stanford.edu, uricchio@stanford.edu

7  
8 Keywords: competition, invasion, coexistence, communities, disease ecology

## 11 Abstract

12 Niche and fitness differences control the outcome of competition, but determin-  
13 ing their relative importance in invaded communities – which may be far from  
14 equilibrium – remains a pressing concern. Moreover, it is unclear whether clas-  
15 sic approaches for studying competition, which were developed predominantly  
16 for pairs of interacting species, will fully capture dynamics in complex species  
17 assemblages. We parameterized a population dynamic model using competition  
18 experiments of two native and three exotic species from a grassland community.  
19 We found evidence for minimal fitness differences or niche differences between  
20 the native species, leading to slow replacement dynamics and priority effects,  
21 but large fitness advantages allowed exotics to unconditionally invade natives.  
22 Priority effects driven by strong interspecific competition between exotic species  
23 drove single-species dominance by one of two exotic species in 80% of model  
24 outcomes, while a complex mixture of non-hierarchical competition and coexis-  
25 tence between native and exotic species occurred in the remaining 20%. Fungal  
26 infection, a commonly hypothesized coexistence mechanism, had weak fitness  
27 effects, and is unlikely to substantially affect coexistence. In contrast to previ-  
28 ous work on pairwise outcomes in largely native-dominated communities, our  
29 work supports a role for nearly-neutral dynamics and priority effects as drivers  
30 of species composition in invaded communities.

## 31 Introduction

32 Understanding the long-term outcome of competition in diverse species assemblages is a major goal of  
33 ecology, but measuring outcomes empirically is often infeasible when dynamics proceed slowly relative to

34 the timescale of experiments. Theoretical coexistence models based on species differences offer a powerful  
35 alternative for predicting competitive outcomes (Burdon and Chilvers, 1974; Tilman, 1980; Holt et al.,  
36 1994). However, linking models to real ecological communities is challenging because realistic param-  
37 eter estimates are rarely available for species interacting within a single ecological context. Moreover,  
38 existing theoretical approaches often make simplifying assumptions—such as reducing analyses to pairs of  
39 interacting species rather than considering the full dynamics of the assemblage—that may affect the in-  
40 ferred outcomes. As a result, considerable uncertainty remains about the relative importance of different  
41 proposed diversity-maintenance mechanisms, and the outcome of competition can be difficult to predict.

42 Among several existing theoretical frameworks for species interactions, modern coexistence theory  
43 clarifies the mechanisms through which species differences affect the outcome of competition via their  
44 effects on niche differences and fitness differences (Chesson, 2000). Niche differences are the differences  
45 between species in resource use, natural enemies, habitat requirements, or other factors that force per-  
46 capita impacts of competition within species to exceed those between species (Chesson, 2000). These  
47 niche differences cause population growth to be negatively frequency-dependent because species achieve  
48 their highest per-capita growth rates when they are rare and interact with mostly heterospecific com-  
49 petitors, while per-capita growth declines as species become common and interact with many conspecific  
50 competitors. By contrast, in this framework, fitness differences are those differences between species  
51 that determine per-capita growth rates independent of relative abundance, often including differences in  
52 fecundity, resource acquisition, or survival. Coexistence occurs when niche differences, which generate  
53 negative frequency-dependent population growth or ‘stabilization’, are strong enough to overcome fitness  
54 differences between species (Chesson, 2000). Alternatively, priority effects can occur when population  
55 growth is positively frequency-dependent, allowing any species that is initially more common to exclude  
56 others but preventing species from invading when rare in the presence of competitors (Mordecai, 2011;  
57 Fukami et al., 2016). While assessing competitive outcomes in pairs of species with known parameter val-  
58 ues is straightforward in this framework, predicting multispecies outcomes remains a challenge (Saavedra  
59 et al., 2017; Barabás et al., 2018).

60 Modern coexistence theory has motivated a suite of studies that empirically measure the strength of  
61 niche differences and fitness differences, and ultimately the outcome of competition, in natural plant or  
62 algal communities. Many of these studies have emphasized the influence of stabilizing niche differences  
63 on species coexistence (Turnbull et al., 2005; Adler et al., 2006; Levine and HilleRisLambers, 2009; Adler  
64 et al., 2010; Narwani et al., 2013; Godoy et al., 2014; Kraft et al., 2015; Godoy et al., 2017). However,  
65 almost all empirical applications of modern coexistence theory use pairwise growth rates when rare  
66 to assess community-wide outcomes (*e.g.*, Adler et al., 2007; Levine and HilleRisLambers, 2009; Adler

67 et al., 2010; HilleRisLambers et al., 2012; Mordecai, 2013; Godoy et al., 2014; Kraft et al., 2015; Mordecai  
68 et al., 2015). A growing body of theory shows that outcomes of competition may depart from pairwise  
69 predictions when all species are analyzed simultaneously (*e.g.*, Case, 1995; Allesina and Levine, 2011;  
70 Saavedra et al., 2017; Mayfield and Stouffer, 2017), and that even two-species models can depart from  
71 the predictions of invasion analyses in some settings (Barabás et al., 2018). Deviations from pairwise  
72 predictions may originate from indirect effects on competitor density, non-hierarchical interactions, in  
73 which competitive impacts are intransitive, or higher-order interactions, in which the per-capita impact  
74 of one species on another is mediated by interactions with a third species. In complex communities it  
75 is theoretically possible to observe priority effects within groups of species with high niche overlap and  
76 fitness similarity, which occur alongside deterministic coexistence or competitive exclusion between groups  
77 of species with larger niche differences and fitness differences. Despite these theoretical developments,  
78 there are few empirical examples of communities in which multispecies outcomes depart from two-species  
79 predictions (but see Mayfield and Stouffer, 2017; Godoy et al., 2017), although alternative stable states  
80 have been empirically documented outside the coexistence literature (Staver et al., 2011; Carpenter  
81 et al., 2011; Fukami et al., 2005). It is unknown whether departures between pairwise and multispecies  
82 predictions are a common biological phenomenon or a quirk of mathematical models. Moreover, it is not  
83 clear how ecological contexts – such as the coevolutionary history of the competing species and the level  
84 of disturbance – may influence the likelihood of complex multispecies dynamics as compared to negative  
85 frequency-dependent stabilization (Ocampo-Ariza et al., 2018).

86 We hypothesized that complex multispecies dynamics would be likely to emerge in recently invaded  
87 systems, in which competing species have not had long coevolutionary histories and hence may not have  
88 had sufficient time to evolve into distinct niches (MacDougall et al., 2009). Such systems may be far from  
89 equilibrium, and may represent an opportunity to study complex multispecies dynamics in the absence of  
90 strong stabilizing mechanisms driven by niche differentiation. Moreover, predicting competitive outcomes  
91 in recently invaded systems is a pressing concern for conservation, and understanding the processes that  
92 have the largest impact on the persistence of native species could help preserve endemic biodiversity. In  
93 this study, we investigated competitive outcomes in California grasslands, one of the most ecologically  
94 important and widespread ecosystems in the Western U.S. and a key reservoir of endemic biodiversity  
95 (Myers et al., 2000). Simultaneously, California grasslands are heavily invaded and human-impacted since  
96 the 19th century (Mack, 1989); exotic annual grasses now dominate while native perennial bunchgrasses  
97 and annual forbs have declined to very low density throughout much of their extent. In the long term, it  
98 is not clear whether the exotic annual grasses will competitively exclude native perennial grasses, whether  
99 native grasses will stably persist (at reduced densities), or whether priority effects will determine whether

100 native or exotic grasses dominate at a local scale.

101 Here, we combine field experiments with mathematical models to predict the outcome of competition  
102 in a community of five co-occurring native and exotic grasses in a grassland ecosystem. We develop  
103 and empirically parameterize population dynamics models for the species in this complex community.  
104 The models incorporate a suite of demographic rates experimentally measured for three different exotic  
105 annual grasses and two native perennial grasses at a single Northern California grassland site and include  
106 the impact of fungal pathogens on those demographic rates, which may affect competitive outcomes  
107 by altering fitness differences or by inducing negative frequency dependence of growth rates (Mordecai,  
108 2011, 2013). We estimate parameters of the model statistically from field observations of seed output,  
109 germination, establishment, seed infection, and adult survival for each of five competing species of exotic  
110 annual and native perennial grasses. Using the parameterized model, we study the multispecies outcome of  
111 competition, with and without pathogens. Specifically, we ask: (1) How strong are intra- and interspecific  
112 competition between native and exotic grass species? (2) What is the predicted outcome of competition?  
113 (3) Do complex outcomes, including priority effects and/or intransitive competition, emerge from the  
114 dynamics of the full multispecies assemblage? (4) How strongly do foliar and seed pathogen impacts on  
115 demographic rates influence the outcome of competition?

## 116 **Methods**

### 117 **Empirical data collection and parameter estimation**

#### 118 **Study system**

119 We chose five focal species that are highly abundant and widespread in California grasslands: exotic an-  
120 nual grasses *Avena barbata*, *Bromus diandrus*, and *Bromus hordeaceus*, and native perennial bunchgrasses  
121 *Stipa pulchra* and *Elymus glaucus*. For each species, we measured a full complement of demographic rates  
122 that determine population growth: seed germination, seedling establishment, the impact of competition  
123 on per-capita seed production, and over-summer survival (for both seedling and adult perennial bunch-  
124 grasses). We also assessed seed infection and survival with a common fungal pathogen that causes a  
125 disease called “black fingers of death,” which can kill native and exotic grass seeds (Beckstead et al.,  
126 2010). All experimental work was conducted in Jasper Ridge Biological Preserve, located in San Mateo  
127 County, California (37°24'N, 122°13'30" W; 66 - 207 m). This 485-hectare biological preserve is managed  
128 by Stanford University and has a Mediterranean climate with cool, wet winters and warm, dry summers

129 (mean annual precipitation = 622.5 mm) (Ackerly et al., 2002). All demographic rates (except the peren-  
130 nial seedling to adult transition probability; see below) were measured in winter 2015 to spring 2016  
131 (the 2016 growing season), an average rainfall year with 601 mm total precipitation distributed over 20  
132 precipitation events.

### 133 **Competition experiment & transect sampling**

134 Seed output is an important component of plant reproduction, and is strongly impacted by competitor  
135 density for many plants (Mordecai, 2013; Mordecai et al., 2015). We measured seed output as a function of  
136 competitor density by varying the density of each plant species in monoculture and in mixed-species plots  
137 and measuring per-capita impact on seed production for each competitor species (Mordecai, 2013; Levine  
138 and HilleRisLambers, 2009). The 1-m<sup>2</sup> competition plots were randomly assigned to five competitor  
139 density treatments ranging from 10% - 100% of each species' estimated natural density in monoculture,  
140 for each of the seven background 'species-groups' (*A. barbata*, *B. diandrus*, *B. hordeaceus*, *E. glaucus*  
141 seedlings, *E. glaucus* adults, *S. pulchra* seedlings, and *S. pulchra* adults). We also cleared 4-m<sup>2</sup> plots  
142 of competitors to measure seed output on individuals of each species at low competitor density (though  
143 natural recruitment from the seed bank meant that these plots were not completely clear of competition).  
144 We used weed matting, weeding, and seed addition to manipulate competitor densities. At the end of  
145 the 2016 growing season we measured seed output from up to three focal plants per species per plot (as  
146 available). See Supplementary Materials for a complete description of the competition experiment.

147 We also measured the impacts of competition on seed production in six transects that naturally  
148 varied in plant composition. Each transect varied in grass composition from native perennial-dominated  
149 at one end to exotic annual-dominated at the other, with five 1-m<sup>2</sup> plots spanning each transect spaced  
150 approximately 5-10m apart. For each focal plant in the transects we estimated seed output, in both the  
151 2015 and 2016 growing seasons (see Supplementary Materials).

152 To assess pathogen damage and its relationship with seed production and competitor density, we  
153 visually estimated leaf area damaged by fungal infection on a subset of leaves on each focal plant in both  
154 the transects and experimental plots. We used these data to quantify the impact of foliar fungal infection  
155 on seed output, as well as the impact of plant species local relative abundance on pathogen damage.  
156 We note that this approach could underestimate the impact of fungal infection if resistance is generally  
157 costly, and most surveyed plants were actively fighting infections.

158 Our attempt to manipulate competitor densities in the experimental plots was only partially successful  
159 because of recruitment from the seed bank. As a result, we combined all focal plants into a single data  
160 set of seed outputs and observed competitor densities (rather than using the target densities for the

161 experimental plots). Our final dataset included 439 *A. barbata*, 399 *B. hordeaceus*, 319 *B. diandrus*, 387  
162 *S. pulchra*, and 234 *E. glaucus* individuals (see Supplementary Materials for further details).

163 We used Markov Chain Monte Carlo (MCMC) to infer parameters relevant to seed output ( $\lambda$ ), com-  
164 petition ( $\alpha$ ), and foliar infection ( $\beta$ ) from our competition experiment data (see dynamic model section  
165 and Table 1 for parameter definitions), and performed simulation-based validation of our estimation pro-  
166 cedure. Full details of this estimation procedure and its validation are provided in the Supplementary  
167 Materials, along with a more detailed description of the experimental design. We repeated the parameter  
168 inference procedures on subsets of the data that included either only the experimental plots or only the  
169 transects, and found that parameter values were of similar magnitude and with overlapping posterior  
170 distributions (see Fig. S7 and Supplementary Materials).

## 171 Germination data

172 We planted marked seeds of each focal species to track germination and seedling establishment in 30 plots  
173 of 25 individuals of each species in November 2015. We recorded their status weekly for four weeks in  
174 January - February as missing (M), alive (A), or alive with  $> 50\%$  of leaf area with pathogen damage (P).  
175 We used a Markov model to estimate the probability of establishing, surviving, and becoming heavily  
176 infected for each species by calculating weekly transition probabilities between these three states by plant  
177 species, then using the matrix to project forward four weeks to estimate the overall probability of germi-  
178 nating and establishing. We repeated this calculation both with pathogens present and with pathogens  
179 removed (*i.e.*, as if all individuals experienced the establishment rates of uninfected individuals), in order  
180 to understand the impact of pathogens on seedling establishment (Fig. S1 shows inferred germination  $g_j$   
181 and establishment  $\phi_j^U$  and  $\phi_j^I$  for uninfected and infected individuals, respectively for each species  $j$ ).

## 182 Seed survival and infection data

183 Seeds that remain dormant in the seed bank may contribute to population growth when they germinate  
184 in future years. To assess survival of non-germinating seeds between years, we buried 30 mesh seed bags  
185 contained five sewn compartments of 100 seeds of each focal plant species 2-5 inches deep from November  
186 2015 - July 2016. We retrieved all intact seeds and scored them for “Black Fingers of Death” (BFOD)  
187 pathogen damage (Beckstead et al., 2010; Mordecai, 2013), which is likely caused by one of the numerous  
188 *Pyrenophora* spp. that are common in these sites (Spear and Mordecai, 2018). We tested all intact,  
189 non-germinated seeds for viability using germinatino, gibberellic acid, and cut tests as in previous work  
190 (Mordecai, 2012). We parameterize the fraction of seeds killed from BFOD infection as  $\gamma_j$  for species  $j$

191 (Fig. S2)

## 192 **Adult survival data**

193 To assess the survival of *S. pulchra* and *E. glaucus*, we marked 200 adult perennial bunchgrasses with flags  
194 in June 2015 at four sites for each species, and revisited prior to senescence in June 2016. We recovered  
195 167 *S. pulchra* and 170 *E. glaucus* flags on the second visit and recorded them alive or dead based  
196 on observing green tissue and/or new fruiting stalks. We fit binomially distributed models of survival  
197 probability for each species using beta-distributed priors with parameters  $\alpha = 1$ ,  $\beta = 1$  (Fig. S3).

## 198 **Perennial transition from seedling to adult**

199 We modeled perennial seedling over-summer survival as a function of competitor density and per-capita  
200 competitive effects using data and fitted parameters from previously published work (Mordecai et al.,  
201 2015). Briefly, we modeled perennial seedling over-summer survival as a Beta-Binomially distributed  
202 process where for each observation  $k$ , the number of surviving seedlings maturing into adulthood was:

$$Y_k \sim \text{BetaBinomial}\left(d, \frac{d(1 - \mu_k)}{\mu_k}, n_k\right), \quad (1)$$

203 where  $\mu_k = \frac{\nu}{1 + \sum_j \alpha_j D_{kj}}$  is the expected value, over all competitor species  $j$ . Here,  $\nu$  is the per-capita  
204 survival probability in the absence of competition,  $\alpha_j$  are the per-capita competitive effects of individuals  
205 of species  $j$ , and  $D_{kj}$  are the number of individuals of species  $j$  in observation  $k$ . In the Beta-Binomial  
206 distribution  $d$  affects the mean and variance, and  $n_k$  is the number of trials in observation  $k$ . The equation  
207 for  $Y_k$  is parameterized so that its mean is equal to  $\mu_k$ . Since we lacked the data to separately estimate  
208  $\alpha_j$  for each individual species in our sample, we estimated an  $\alpha_j$  for perennial adults, perennial seedlings,  
209 and exotic annuals, respectively.

## 210 **Population dynamic model**

### 211 **Model structure**

212 We developed a dynamic model that captures the effects of competition and fungal infection on growth  
213 rates for each grass species in our system, which is structurally similar to models developed in previous  
214 work (Mordecai, 2013; Mordecai et al., 2015). All parameters and variables in the population dynamic  
215 model are listed in Table 1. To model the effects of competition on the population growth of each species,

216 we suppose that each plant of species  $j$  has a seed output of  $\lambda_j$  in the absence of competition, and that  
 217 competition and infection reduce seed output by

$$f_j(t) = \frac{1}{1 + (\sum_l \alpha_{jl} D_l(t)) + A_j \beta_j}, \quad (2)$$

218 where  $D_l(t)$  is the density of competitor species  $l$  per  $\text{m}^2$  at time  $t$  and  $A_j$  is the mean leaf area that was  
 219 infected on individuals of species  $j$ . The expected seed output of a single individual  $S_j(t)$  is then

$$S_j(t) = \lambda_j f_j(t). \quad (3)$$

220 In the absence of transmission information we do not explicitly model transmission of fungal pathogens,  
 221 but simply assume that each individual is infected at the mean level of observed foliar fungal infection  
 222 for species  $j$ .

223 For each species  $j$ , we suppose that a fraction  $g_j$  of the seeds germinate, and among these a fraction  
 224  $\gamma_j$  are infected with a fungal seed pathogen (BFOD). Seeds that germinate and are not infected may  
 225 then establish, or may be eliminated before they ever produce seeds. We supposed that the probability  
 226 of establishment depends on foliar fungal infection status, and separately estimated the probability of  
 227 establishment for infected ( $\phi_j^I$ ) and uninfected ( $\phi_j^U$ ) seedlings for each species  $j$ . The proportion of  
 228 seedlings that are infected during the transition is given by  $P_j^I$ .

229 Perennial seedlings are presumed to be weak competitors and are not included in the competition  
 230 model and produce no seeds in the first year of life (Mordecai et al., 2015), but are subject to competition  
 231 in their survival over their first summer. Perennial seedlings survive at rate  $\nu_j(t)$ , given by

$$\nu_j(t) = \frac{\nu_j^0}{1 + \alpha_s D_s(t) + \alpha_a D_a(t) + \alpha_n D_n(t)}, \quad (4)$$

232 where  $D$  is the density of competitors, the subscripts  $s$ ,  $a$ , and  $n$  represent perennial seedlings, perennial  
 233 adults, and annuals, respectively, and  $\nu_j^0$  is the survival rate in the absence of competition. For this  
 234 aspect of the model, we group all annual and perennial plants together instead of computing each species  
 235 competitive effect separately because we lacked the data necessary to infer the parameters for each  
 236 species individually. Perennial seedlings that survive the summer then become adults in the following  
 237 year. Perennial adults are also subject to over-summer mortality at rate  $(1-\xi_j)$ , modeled as competition-  
 238 independent because deaths of adult bunchgrasses are relatively rare (Fig. S3).

239 We model germination rate  $G_j$  after accounting for infection and establishment (see “Seed survival  
 240 and infection data” section) with

$$G_j = g_j (1 - \gamma_j) (\phi_j^U (1 - P_j^I) + \phi_j^I P_j^I). \quad (5)$$



241 Additionally, we suppose that the proportion of seeds remaining in the seed bank after germination and  
242 infection  $B_j$  is given by

$$B_j = (1 - \gamma_j)(1 - g_j). \quad (6)$$

243 At each time step, for each species  $j$  we track the number of seeds  $n_j^a(t)$  for exotic annuals, or the  
244 number of seeds  $n_j^p(t)$  and adults  $a_j(t)$  for perennials. Combining across seed production, competition,  
245 foliar fungal infection, fungal seed infection, germination, establishment, and over-summer survival, the  
246 full population growth equations are

$$n_j^a(t+1) = n_j^a(t) (G_j \lambda_j f_j(t) + B_j), \quad (7)$$

$$n_j^p(t+1) = a_j(t) \lambda_j f_j(t) + n_j^p(t) B_j, \quad (8)$$

$$a_j(t+1) = a_j(t) \xi_j + n_j^p(t) G_j \nu_j(t). \quad (9)$$

249 The germination, adult survival, seed infection, and seedling transition parameters were estimated as  
250 described in the previous sections. The competition ( $\alpha$ ), seed output ( $\lambda$ ), and foliar infection burden ( $\beta$ )  
251 were estimated using custom MCMC software, as described in the supplemental methods. Simulations of  
252 each species in monoculture shows a strong positive correlation with observed monoculture densities in  
253 the field (Fig. S6), suggesting that our model parameterization with independently measured demographic  
254 rates accurately describes the system.

## 255 Separating infectious processes from competition

256 Initially we considered three broad classes of models that 1) did not include the impacts of infection,  
257 2) included only foliar infection, and 3) included both foliar infection and BFOD pathogen. Since foliar  
258 infection had a negligible impact on dynamics and competitive outcomes, we compare models that include  
259 only foliar fungal infection to models that include both foliar infection and BFOD. The foliar infection  
260 model includes both the parameters relevant to infection of perennial seedlings during their transition to  
261 adults and infection of leaves of adult perennials and exotic annuals.

## 262 Inferring the outcome of competition

263 We used the parameterized models to investigate the outcome of competition using both pairwise and  
264 multispecies approaches, to assess any differences in the outcome across approaches and to understand  
265 potentially complex outcomes more mechanistically. First, we used the posterior parameter estimates  
266 and the population dynamic model to compute growth rate when rare (GRWR) for each pair of species.

267 If a pair of species each have  $\text{GRWR} > 1$  (i.e.,  $\log(\text{GRWR}) > 0$ , where  $\log$  is the natural logarithm), then  
268 stable coexistence is predicted because the rarer species is expected to increase in prevalence, preventing  
269 either species from being excluded (Turelli 1978; but see Case 1995). Pairwise competition calculations  
270 were performed in the presence of fungal infection (i.e., including all model parameters pertinent to foliar  
271 or seed fungal infection).

272 To calculate GRWR for each species pair, we sampled the relevant demographic rate parameters from  
273 their posterior distributions and simulated one species forward to its stable monoculture density, then  
274 computed the growth rate of an invader of another species. For perennials, we computed GRWR as the  
275 dominant eigenvalue of the 2x2 matrix describing the rate of transition between seed and adult stages,  
276 which accounts for their stage-structured life history (Mordecai, 2013). For exotic annuals, we calculated  
277 GRWR by simulating the addition of a single individual to the monoculture species and calculating the  
278 growth rate in the second generation. We also calculated percent difference in GRWR (pdGRWR) as  
279  $100 \left(1 - \frac{A}{B}\right)$ , where  $B$  is the GRWR in an empty plot, and  $A$  is the GRWR under invasion conditions.

280 Second, we investigated competitive outcomes for the full species assemblage using simulations. Be-  
281 cause outcomes could be initial condition-dependent, we initialized our simulations at a range of observed  
282 densities from the transects. We simulated 600 years and report results of species mixtures at this time  
283 point (Mordecai, 2013). For species that were not present in a sampled transect, we introduced a pseudo-  
284 count of one individual so that each species is initially present in each simulation. We consider species  
285 with population sizes exceeding one individual at the end of the simulation to have “persisted”, while  
286 species with less than one individual are “excluded.”

287 Lastly, we performed invasion experiments to better understand the dynamics underlying some of  
288 the coexistence outcomes that were predicted under our model. In these experiments, we compared the  
289 ability of *E. glaucus* to invade established *S. pulchra* plots with and without the presence of an exotic  
290 annual competitor. We considered only the subset of posterior parameter estimates in which *S. pulchra*  
291 was predicted to coexist with *B. diandrus*, excluding all replicates in which single species dominance  
292 was predicted. We simulated 100 years of *S. pulchra* growth in the absence of competitors to allow  
293 it to establish. Subsequently, at time  $t = 100$ , we either invaded *B. diandrus* or allowed *S. pulchra*  
294 to continue in the absence of competitors for another 100 years, and finally we introduced a single *E.*  
295 *glaucus* individual at time  $t = 200$ . We summarized these experiments by calculating the proportion of  
296 posterior samples in which *S. pulchra* is able to prevent *E. glaucus* from invading after 600 simulated  
297 years post-invasion. We sampled one set of parameters randomly from among the posterior estimates to  
298 display this invasion experiment, but note that we vary the timing of the invasions for the purpose of  
299 visualization (Fig. 4).

## 300 Results

### 301 Evidence for strong interspecies competition

302 We calculated the pairwise  $\log(\text{GRWR})$ , where zero is the threshold for invasion, of each species invading  
303 a monoculture of each other species to assess the pairwise outcomes of competition (Fig. 1A). We also  
304 calculated the proportional decrease in GRWR relative to the growth rate in the absence of competition  
305 to assess the overall impact of competition on population growth (pdGRWR, Fig. 1B). The values plotted  
306 in Fig. 1 represent the mean over 250 independent samples of the parameters from their posterior dis-  
307 tribution. If there were strong niche differences between all pairs of species, each species would strongly  
308 constrain its own growth rate but to have a relatively weak competitive impact on other species. By  
309 contrast, we observed high niche overlap in this system, in which interspecific competition constrains in-  
310 vasion growth rates as much or more than intraspecific competition (Fig. 1A). Along the diagonal, where  
311 each species competes with itself at its stable monoculture density, the  $\log(\text{GRWR})$  was always very near  
312 zero (Fig. 1A). When the native perennial species (*E. glaucus* and *S. pulchra*) were the invaders, they  
313 were constrained to log growth rates close to zero by all competitors except *A. barbata*, which is unable  
314 to constrain either species. By contrast, neither perennial species reduced the  $\log(\text{GRWR})$  of any of the  
315 annual species to below zero. *B. hordeaceus* and *B. diandrus* tightly constrained each others' growth  
316 rates, but were not strongly constrained by the perennial competitors. *A. barbata* was a poor competi-  
317 tor in this community, and only constrained itself while being tightly constrained by both of its annual  
318 competitors.

319 These results are not driven solely by some species having low overall (competition-independent)  
320 growth rates, because competition reduced GRWR for nearly all species pairs (Fig. 1B). The strongest  
321 impacts of competition were of *B. diandrus* and *B. hordeaceus* on each other, resulting in growth rates  
322 reduced by 95 – 96.4% relative to the absence of competition. *E. glaucus* and *S. pulchra* were also subject  
323 to competition with each other, reducing *S. pulchra*'s growth rate 49.3 – 51% and *E. glaucus*'s growth  
324 rate by 72.7 – 73.6% relative to growth rates in absence of competition. The impacts of *B. diandrus* and  
325 *B. hordeaceus* on the perennials were of similar magnitude to the observed perennial-perennial impacts.

### 326 Predicted community composition is exotic annual-dominated

327 We next sought to investigate competitive outcomes when all five species compete simultaneously. Al-  
328 though it would be possible to perform a multispecies invasion analysis, such analyses can provide mis-  
329 leading results because GRWR exceeding 1 does not necessarily imply stable persistence when more than

330 two species are included (Case, 1995; Dormann and Roxburgh, 2005; Saavedra et al., 2017). Instead,  
331 we examined the outcomes of competition by directly assessing the final simulated community composi-  
332 tion across a range of empirically observed densities as initial conditions. For this analysis (Fig. 2A) we  
333 included the impact of foliar fungal infection on demographic rates, but not the pathogen BFOD.

334 Based on our two-species competition observations (Fig. 1), we expected that either *B. hordeaceus* or  
335 *B. diandrus* would persist in most simulations because they have large growth rates even when invading  
336 a monoculture of native perennial competitors. Since this species pair displayed large interspecific com-  
337 petition coefficients, we also expected that they would rarely coexist. The pairwise invasion analysis also  
338 suggests that *A. barbata* should rarely persist given its low growth rate in the presence of its competi-  
339 tors, and that the native perennials *S. pulchra* and *E. glaucus* would sometimes persist, given that their  
340 mean replacement rates were typically near one (Fig. 1A). Consistent with these expectations, either *B.*  
341 *hordeaceus* or *B. diandrus* persisted in 99.7% of simulation replicates (Fig. 2A), while the two species  
342 almost never coexisted with each other (0.32% of replicates). *A. barbata* was nearly always excluded.  
343 Native perennials persisted in 22.0% of replicates, usually by coexisting with either *B. hordeaceus* or *B.*  
344 *diandrus*, but rarely coexisting with each other (0.39% of replicates).

345 The wide range of possible outcomes could reflect either uncertainty in the parameter estimates or  
346 dependence on the initial conditions of our simulations. To differentiate between these possibilities, we  
347 investigated persistence as a function of initial competitor densities (Fig. 3). If each species' success  
348 is strongly dependent on initial conditions, this suggests that priority effects play a much larger role  
349 in determining community composition than uncertainty in parameter estimates, and vice versa. We  
350 observed that the perennial species' persistence in multispecies competition was weakly dependent on  
351 initial community composition: the probability of *S. pulchra* persistence increased modestly with its  
352 initial density. By contrast, the annual species *B. hordeaceus* and *B. diandrus* showed striking priority  
353 effects driven by strong interspecific competition across the densities of all competitors except *A. barbata*,  
354 which had only modest effects on any species.

## 355 **Non-hierarchical competition between natives and exotics**

356 Notably, the two native perennial species were not equally likely to coexist with each of the dominant  
357 exotic annuals: *S. pulchra* was much more likely to coexist with *B. diandrus* than *B. hordeaceus*. To  
358 better understand the dynamics driving these outcomes, we compared invasion simulations that included  
359 only the native perennials to simulations in which an exotic annual invader preceded the native perennial  
360 invader.

361 When the native perennials competed in the absence of exotic annuals, their dynamics are nearly-  
362 neutral, as indicated by the near equality intraspecific and interspecific competition strength (Fig. 1A).  
363 Although neutral dynamics cannot result in long-term stable coexistence, they are expected to result in  
364 relatively slow loss of one of the species (Adler et al., 2007). Nearly-neutral dynamics could result in  
365 priority effects if interspecific competition is slightly stronger than intraspecific competition. Consistent  
366 with these expectations, we observed slow replacement dynamics and priority effects when the native  
367 perennial species competed directly (Fig. 4A). When *S. pulchra* was introduced first, 36.4% of simulation  
368 replicates resulted in dominance by *S. pulchra*, whereas 99.9% of replicates in which *E. glaucus* was  
369 introduced first resulted in dominance by *E. glaucus*. The two perennial species coexisted in only 0.1%  
370 of replicates.

371 We next tested how the invasion of exotic annuals might alter competition outcomes between the  
372 two perennial species. When *B. diandrus* invaded simulated monocultures of *S. pulchra*, the priority  
373 effect preventing *E. glaucus* from invading was substantially stronger. Among replicates in which *S.*  
374 *pulchra* and *B. diandrus* coexisted, *E. glaucus* was able to invade in only 4.5% (as compared to 52.9%  
375 of these same parameter sets when *B. diandrus* was not included in the simulation). Hence, when  
376 coexistence was predicted between *S. pulchra* and *B. diandrus*, the presence of the exotic annual *B.*  
377 *diandrus* increased the likelihood of persistence for *S. pulchra* at the expense of *E. glaucus* (Fig. 4).  
378 These results suggest a strong impact of non-hierarchical competition on outcomes in this system, in  
379 which no single species can dominate and coexistence is only possible given specific arrival orders. These  
380 dynamics result in deterministic competitive exclusion or coexistence mediated by priority effects that  
381 make the final composition dependent on stochastic arrival order.

## 382 **Seed infection hampers a weak competitor, *A. barbata***

383 While the simulation and invasion results suggest that exotic annuals will dominate perennials and either  
384 competitively exclude them or reduce their population sizes, pathogens could reduce this effect if exotic  
385 annuals incur a higher fitness cost than perennials from infection. We repeated the simulation experiments  
386 in the previous section with the impact of fungal infection by BFOD included (Fig. 2B). BFOD decreased  
387 the overall success of *A. barbata*, which was already the weakest annual competitor. *A. barbata* persisted in  
388 1.98% of replicates that excluded BFOD, but almost never persisted in its presence (0.12% of replicates).  
389 Species other than *A. barbata* were only minimally affected by BFOD, consistent with low rates of infection  
390 that we observed empirically (Fig. S2).

## 391 Discussion

392 The long-term outcome of competition is difficult to observe directly in nature, so empirically parameter-  
393 ized mathematical models are critical for predicting when competitive exclusion, coexistence, or priority  
394 effects are most likely. To date, most studies have focused on pairwise outcomes in multispecies com-  
395 munities, emphasizing the relative strength of niche differences versus fitness differences (Levine and  
396 HilleRisLambers, 2009; Adler et al., 2010; Narwani et al., 2013; Godoy and Levine, 2014; Godoy et al.,  
397 2014; Kraft et al., 2015). By contrast, we found a large degree of niche overlap in an empirically pa-  
398 rameterized model of an invaded California grassland (Fig. 1A). The model suggests that competition  
399 in multispecies assemblages can lead to complex outcomes that mix deterministic competitive exclusion  
400 or coexistence with stochastic priority effects that determine the identity of persisting species. Although  
401 a previous model predicted exotic annual dominance over native perennials, with a small probability of  
402 native coexistence with exotics, it did not predict priority effects among pairs of exotic or native species  
403 because it relied solely on a pairwise approach and composite parameter estimates from a range of species  
404 (Mordecai et al., 2015). Our work supports the results from a growing body of theoretical studies sug-  
405 gesting that competitive outcomes in complex communities can depart from predictions from pairwise  
406 species comparisons (Case, 1995; Allesina and Levine, 2011; Saavedra et al., 2017; Mayfield and Stouffer,  
407 2017), and provides evidence that slowly occurring, nearly-neutral dynamics may play an important role  
408 in competitive outcomes (Adler et al., 2007). The results suggest that methods for assessing the outcome  
409 of competition in multispecies assemblages that move beyond invasion analyses are an important avenue  
410 for theoretical and empirical development (Saavedra et al., 2017; Barabás et al., 2018).

411 We found that the population growth model parameterized with field estimates of demographic rates  
412 accurately predicted species densities in monoculture (Fig. S6), suggesting that it can realistically capture  
413 equilibrium outcomes. In this five-species assemblage we found species pairs with high niche overlap—  
414 exotic annuals *B. diandrus* and *B. hordeaceus*; and native perennials *E. glaucus* and *S. pulchra*—and  
415 non-hierarchical competition such that no single species was dominant over all others (Fig. 1). This  
416 results in a complex posterior distribution of competitive outcomes that includes competitive exclusion  
417 of all other species by either *B. diandrus* or *B. hordeaceus*, or coexistence of one of these exotic annuals  
418 with one native perennial, either *E. glaucus* or *S. pulchra* (Fig. 2). The outcome of competition between  
419 the two congeneric exotic annuals was driven by strong interspecific competition, resulting in priority  
420 effects (Fig. 3). Among the subset of outcomes in which coexistence was predicted between *S. pulchra*  
421 and *B. diandrus*, the presence of *B. diandrus* usually prevented the subsequent invasion of *E. glaucus*,  
422 augmenting the priority effect exerted by *S. pulchra* on its native perennial competitor through non-

423 hierarchical competition. Hence, invasion by an exotic species with moderate niche overlap may increase  
424 resilience to invasion by native competitors with high niche overlap. Since the two native species are  
425 predicted to compete nearly-neutrally in the model, almost all predicted outcomes precluded their long-  
426 term stable coexistence, meaning that *S. pulchra* may indirectly benefit from invasion by *B. diandrus* via  
427 its negative effect on *E. glaucus* (Fig. 4).

428 Studies applying modern coexistence theory have often documented substantial niche differences be-  
429 tween species pairs, while variation in the magnitude of fitness difference determines the potential for  
430 coexistence or competitive exclusion. However, these studies typically explore communities in which  
431 species have long coevolutionary histories and belong to similar functional guilds (*e.g.*, native annual  
432 forbs) (Levine and HilleRisLambers 2009; Adler et al. 2010; Godoy et al. 2014; Kraft et al. 2015; Narwani  
433 et al. 2013; but see Godoy and Levine 2014). In such systems, we might expect that co-occurrence over  
434 long timescales has led species to minimize their fitness differences, maximize their niche differences,  
435 or both, leading to long-term stable coexistence. In invaded systems, exotic species must have fitness  
436 advantages, niche differences, or both with respect to the native species in order to have successfully  
437 invaded (MacDougall et al., 2009). Our study found support for large fitness advantages of invading  
438 species and modest niche overlap that was potentially small enough to promote coexistence (20% poste-  
439 rior probability). This is consistent with the possibility that competitive exclusion and priority effects  
440 may be common long-term outcomes in invaded communities. Despite the *a priori* expectation of strong  
441 stabilization within coevolved communities, our study did not identify substantial niche differences be-  
442 tween the two native species or the two exotic *Bromus* species with an overlapping European home range.  
443 Instead, the results suggest that nearly-neutral dynamics determine competitive outcomes in some pairs  
444 of species with long coevolutionary histories.

445 Among the mechanisms that may maintain diversity in complex communities, intransitive competition  
446 has received a great deal of interest (Laird and Schamp, 2006; Allesina and Levine, 2011; Soliveres et al.,  
447 2015; Matías et al., 2018; Stouffer et al., 2018). However, a recent study using empirically parameterized  
448 population dynamic models found that intransitive competition was uncommon and not likely to promote  
449 coexistence among a set of 18 competing annual grass species (Godoy et al., 2017). In our study, although  
450 we found evidence for non-hierarchical competition, simulations suggested that it was unlikely to promote  
451 coexistence of more than two species. However, this does not imply that non-hierarchical competition  
452 has no role in diversity maintenance. Priority effects, like those reported here, could lead to a spatial  
453 patchwork of competitors, with disturbance and stochastic recolonization determining the distribution of  
454 competing species.

455 Previous empirical work on the outcome of competition in invaded California grasslands has suggested



456 a wide range of possible outcomes and coexistence mechanisms, including (1) the requirement for previous  
457 disturbance to explain the invasion of exotics in perennial-dominated plots (Stromberg and Griffin, 1996;  
458 Seabloom et al., 2003; Corbin and D’Antonio, 2004), (2) competitive dominance of exotic annuals over  
459 *S. pulchra* (Dyer and Rice, 1997), and (3) spatial variation in outcomes determined by seed dispersal  
460 (DiVittorio et al., 2007) and habitat (Everard et al., 2009). A limitation of most previous work considering  
461 more than two competing species is that the empirical results were not linked to a dynamic model, making  
462 it difficult to project dynamics over long timescales. Our parameterized model is inconsistent with (1)  
463 because it predicts that exotic species can invade undisturbed perennial plots, and consistent with (2)  
464 because a portion of predicted outcomes led to unconditional exotic dominance, as predicted in a previous  
465 two-species model (Mordecai et al., 2015).

466 While our study did not attempt to assess environmental and spatial variation in competitive out-  
467 comes (*i.e.*, prediction (3) above), coexistence mechanisms occurring over broad temporal and spatial  
468 scales may be an important contributor to observed species distributions. The five focal species in our  
469 system have co-occurred at the study site and other California grassland sites for over a hundred years, im-  
470 plying that co-occurrence may be driven by non-equilibrium dynamics that play out over long timescales,  
471 or that stabilizing processes occur over larger spatial or temporal scales. Although soil moisture and nu-  
472 trient availability vary spatially at both neighborhood and regional scales across California grasslands and  
473 precipitation varies several-fold between years, demographic studies of species interactions are regularly  
474 conducted at small spatial and temporal scales, as in the present study (Seabloom et al., 2003; Corbin and  
475 D’Antonio, 2004; DiVittorio et al., 2007). Environmental variation combined with the long lifespans of  
476 perennial bunchgrasses and the high seed production of annual grasses could provide ample opportunity  
477 for environmental fluctuations to promote coexistence over space or time (Warner and Chesson, 1985;  
478 Cáceres, 1997; Chesson, 2000; Chesson et al., 2005; Li and Chesson, 2018; Usinowicz et al., 2017). An  
479 alternative to larger-scale stabilizing processes is that priority effects occur at small spatial scales, while  
480 the turnover and random colonization of sites allows patches of different species composition to persist  
481 in a matrix of mutually non-invasible patches (Vannette and Fukami, 2014). Our results are consistent  
482 with this priority effect mechanism, and do not preclude the possibility of coexistence mechanisms occur-  
483 ring over larger scales. A major challenge for future work in systems with large and variable geographic  
484 ranges is to incorporate multi-scale spatial and temporal variation that may contribute to patterns of  
485 co-occurrence.

486 In addition to the outcome of competition, identifying explanatory mechanisms is paramount for  
487 understanding the assembly of ecological communities and their potential to respond to species invasions.  
488 Pathogens are widely hypothesized to promote species diversity by specializing on common host species,



489 causing a demographic disadvantage to common species and an advantage to rare species (Mordecai,  
490 2011, 2013; Bagchi et al., 2014; Petermann et al., 2008; Gilbert et al., 1994; Augspurger and Kelly, 1984;  
491 Augspurger, 1983). As with strong niche differences more generally, this Janzen-Connell effect has been  
492 demonstrated mostly in native-dominated plant communities (Augspurger, 1983, 1984; Augspurger and  
493 Kelly, 1984; Gilbert et al., 1994; Petermann et al., 2008; Bagchi et al., 2014). By contrast, pathogen  
494 impacts in this invaded grassland community differ in two important ways. First, the foliar fungal  
495 pathogens in this community typically infect multiple grass hosts, including native and exotic species  
496 (Spear and Mordecai, 2018). Second, the demographic impacts were mostly minimal, except the negative  
497 impact exerted by the Black Fingers of Death pathogen on *A. barbata* (Fig. 2B). Another study in this  
498 system found no evidence that pathogen load or impacts increased on locally common species, suggesting  
499 that coexistence is not substantially affected by fungal infection (Spear and Mordecai, 2018). However,  
500 because the two native perennial species compete almost neutrally in our model, even modest pathogen  
501 impacts could have a substantial effect; because their fitness differences are small, our study may have  
502 been underpowered to investigate this specific outcome.

503       Though the outcome of competition in invaded systems is often poorly understood, our work shows  
504 that stabilizing niche differences, and particularly the role of pathogens in that stabilization, are not  
505 ubiquitous at local scales in nature, especially in systems with short coevolutionary histories between  
506 species. Assessing the strength of stabilization and the outcome of competition is important not only for  
507 fundamental ecological understanding but also for maintaining resilient ecosystems as they respond to  
508 global change. Future work in other systems that are potentially far from equilibrium, such as invaded  
509 ecosystems, is necessary to test the generality of our results, and to predict the long-term outcome of  
510 competition in nature.

## 511 Acknowledgments

512 We thank our editors and anonymous reviewers at *The American Naturalist* for comments that improved  
513 the quality of the manuscript. We acknowledge generous support and assistance from Teri Barry, Nona  
514 Chiariello, Phillippe Cohen, Joe Sertich, Reuben Brandt, Johannah Farner, Steve Gomez, Bill Gomez,  
515 Stuart Koretz, Cary Tronson, Divya Ramani, Ryan Tabibi, Esther Liu, Sandya Kalavacherla, Vidya  
516 Raghvendra, Jason Zhou, Virginia Parra, Claudia Amadeo-Luyt, Gaurika Duvar, Elizabeth Wallace,  
517 the Jasper Ridge Kennedy endowment fund, the Stanford University Vice Provost for Undergraduate  
518 Education summer research fellowship for undergraduates, and the Stanford University Raising Interest  
519 in Science and Engineering (RISE) summer internship program. We thank members of the Fukami, Peay,

520 and Mordecai labs for helpful comments on the project, and Rodrigo R. Granjel, Ignasi Bartomeus, Oscar  
521 Godoy, and members of the Biotic Interactions and Global Change group for their preprint peer-review  
522 of our manuscript. LHU was supported by the NIH IRACDA fellowship (NIGMS grant K12GM088033).  
523 EAM was supported by a grant from the National Science Foundation (DEB-1518681).

## References

- 524  
525 Ackerly, D., C. Knight, S. Weiss, K. Barton, and K. Starmer. 2002. Leaf size, specific leaf area and micro-  
526 habitat distribution of chaparral woody plants: contrasting patterns in species level and community  
527 level analyses. *Oecologia* 130:449–457.
- 528 Adler, P. B., J. HilleRisLambers, P. C. Kyriakidis, Q. Guan, and J. M. Levine. 2006. Climate variability  
529 has a stabilizing effect on the coexistence of prairie grasses. *Proceedings of the National Academy of*  
530 *Sciences* 103:12793–12798.
- 531 Adler, P. B., J. HilleRisLambers, and J. M. Levine. 2007. A niche for neutrality. *Ecology letters* 10:95–104.
- 532 Adler, P. B., S. P. Ellner, and J. M. Levine. 2010. Coexistence of perennial plants: an embarrassment of  
533 niches. *Ecology letters* 13:1019–1029.
- 534 Allesina, S., and J. M. Levine. 2011. A competitive network theory of species diversity. *Proceedings of*  
535 *the National Academy of Sciences* 108:5638–5642.
- 536 Augspurger, C. K. 1983. Seed dispersal of the tropical tree, *Platypodium elegans*, and the escape of its  
537 seedlings from fungal pathogens. *The Journal of Ecology* pages 759–771.
- 538 ———. 1984. Seedling survival of tropical tree species: interactions of dispersal distance, light-gaps, and  
539 pathogens. *Ecology* 65:1705–1712.
- 540 Augspurger, C. K., and C. K. Kelly. 1984. Pathogen mortality of tropical tree seedlings: experimental  
541 studies of the effects of dispersal distance, seedling density, and light conditions. *Oecologia* 61:211–217.
- 542 Bagchi, R., R. E. Gallery, S. Gripenberg, S. J. Gurr, L. Narayan, C. E. Addis, R. P. Freckleton, and  
543 O. T. Lewis. 2014. Pathogens and insect herbivores drive rainforest plant diversity and composition.  
544 *Nature* 506:85.
- 545 Barabás, G., R. D’Andrea, and S. M. Stump. 2018. Chesson’s coexistence theory. *Ecological Monographs*  
546 88:277–303.
- 547 Beckstead, J., S. E. Meyer, B. M. Connolly, M. B. Huck, and L. E. Street. 2010. Cheatgrass facilitates  
548 spillover of a seed bank pathogen onto native grass species. *Journal of Ecology* 98:168–177.
- 549 Burdon, J., and G. Chilvers. 1974. Fungal and insect parasites contributing to niche differentiation in  
550 mixed species stands of eucalypt saplings. *Australian Journal of Botany* 22:103–114.
- 551 Cáceres, C. E. 1997. Temporal variation, dormancy, and coexistence: a field test of the storage effect.  
552 *Proceedings of the National Academy of Sciences* 94:9171–9175.
- 553 Carpenter, S. R., J. J. Cole, M. L. Pace, R. Batt, W. Brock, T. Cline, J. Coloso, J. R. Hodgson, J. F.  
554 Kitchell, D. A. Seekell, et al. 2011. Early warnings of regime shifts: a whole-ecosystem experiment.  
555 *Science* 332:1079–1082.
- 556 Case, T. J. 1995. Surprising behavior from a familiar model and implications for competition theory. *The*  
557 *American Naturalist* 146:961–966.
- 558 Chesson, P. 2000. Mechanisms of maintenance of species diversity. *Annual review of Ecology and*  
559 *Systematics* 31:343–366.

- 560 Chesson, P., M. J. Donahue, B. A. Melbourne, and A. L. Sears. 2005. Scale transition theory for  
561 understanding mechanisms in metacommunities. *Metacommunities: spatial dynamics and ecological*  
562 *communities* pages 279–306.
- 563 Corbin, J. D., and C. M. D’Antonio. 2004. Competition between native perennial and exotic annual  
564 grasses: implications for an historical invasion. *Ecology* 85:1273–1283.
- 565 DiVittorio, C. T., J. D. Corbin, and C. M. D’Antonio. 2007. Spatial and temporal patterns of seed  
566 dispersal: an important determinant of grassland invasion. *Ecological Applications* 17:311–316.
- 567 Dormann, C. F., and S. H. Roxburgh. 2005. Experimental evidence rejects pairwise modelling approach  
568 to coexistence in plant communities. *Proceedings of the Royal Society of London B: Biological Sciences*  
569 272:1279–1285.
- 570 Dyer, A., and K. Rice. 1997. Intraspecific and diffuse competition: the response of *Nassella pulchra* in a  
571 California grassland. *Ecological Applications* 7:484–492.
- 572 Everard, K., E. W. Seabloom, W. S. Harpole, and C. de Mazancourt. 2009. Plant water use affects  
573 competition for nitrogen: why drought favors invasive species in California. *The American Naturalist*  
574 175:85–97.
- 575 Fukami, T., T. M. Bezemer, S. R. Mortimer, and W. H. van der Putten. 2005. Species divergence and  
576 trait convergence in experimental plant community assembly. *Ecology letters* 8:1283–1290.
- 577 Fukami, T., E. A. Mordecai, and A. Ostling. 2016. A framework for priority effects. *Journal of vegetation*  
578 *science* 27:655–657.
- 579 Gilbert, G., R. Foster, and S. Hubbell. 1994. Density and distance-to-adult effects of a canker disease of  
580 trees in a moist tropical forest. *Oecologia* 98:100–108.
- 581 Godoy, O., and J. M. Levine. 2014. Phenology effects on invasion success: insights from coupling field  
582 experiments to coexistence theory. *Ecology* 95:726–736.
- 583 Godoy, O., N. J. Kraft, and J. M. Levine. 2014. Phylogenetic relatedness and the determinants of  
584 competitive outcomes. *Ecology Letters* 17:836–844.
- 585 Godoy, O., D. B. Stouffer, N. J. Kraft, and J. M. Levine. 2017. Intransitivity is infrequent and fails to  
586 promote annual plant coexistence without pairwise niche differences. *Ecology* 98:1193–1200.
- 587 HilleRisLambers, J., P. Adler, W. Harpole, J. Levine, and M. Mayfield. 2012. Rethinking community  
588 assembly through the lens of coexistence theory. *Annual Review of Ecology, Evolution, and Systematics*  
589 43.
- 590 Holt, R. D., J. Grover, and D. Tilman. 1994. Simple rules for interspecific dominance in systems with  
591 exploitative and apparent competition. *The American Naturalist* 144:741–771.
- 592 Kraft, N. J., O. Godoy, and J. M. Levine. 2015. Plant functional traits and the multidimensional nature  
593 of species coexistence. *Proceedings of the National Academy of Sciences* 112:797–802.
- 594 Laird, R. A., and B. S. Schamp. 2006. Competitive intransitivity promotes species coexistence. *The*  
595 *American Naturalist* 168:182–193.

- 596 Levine, J. M., and J. HilleRisLambers. 2009. The importance of niches for the maintenance of species  
597 diversity. *Nature* 461:254.
- 598 Li, Y. M., and P. Chesson. 2018. Seed demographic comparisons reveal spatial and temporal niche  
599 differentiation between native and invasive species in a community of desert winter annual plants.  
600 *Evolutionary Ecology Research* 19:71–84.
- 601 MacDougall, A. S., B. Gilbert, and J. M. Levine. 2009. Plant invasions and the niche. *Journal of Ecology*  
602 97:609–615.
- 603 Mack, R. N. 1989. Temperate grasslands vulnerable to plant invasions: characteristics and consequences.  
604 In H. A. M. J. A. Drake, and F. D. Castri, eds., *Biological invasions: a global perspective*, pages  
605 155–179. Wiley, New York.
- 606 Matías, L., O. Godoy, L. Gómez-Aparicio, and I. M. Pérez-Ramos. 2018. An experimental extreme  
607 drought reduces the likelihood of species to coexist despite increasing intransitivity in competitive  
608 networks. *Journal of Ecology* 106:826–837.
- 609 Mayfield, M. M., and D. B. Stouffer. 2017. Higher-order interactions capture unexplained complexity in  
610 diverse communities. *Nature Ecology & Evolution* 1:0062.
- 611 Mordecai, E. A. 2011. Pathogen impacts on plant communities: unifying theory, concepts, and empirical  
612 work. *Ecological Monographs* 81:429–441.
- 613 ———. 2012. Soil moisture and fungi affect seed survival in California grassland annual plants. *Plos One*  
614 7:e39083.
- 615 ———. 2013. Despite spillover, a shared pathogen promotes native plant persistence in a cheatgrass-  
616 invaded grassland. *Ecology* 94:2744–2753.
- 617 Mordecai, E. A., N. A. Molinari, K. A. Stahlheber, K. Gross, and C. D’Antonio. 2015. Controls over  
618 native perennial grass exclusion and persistence in California grasslands invaded by annuals. *Ecology*  
619 96:2643–2652.
- 620 Myers, N., R. A. Mittermeier, C. G. Mittermeier, G. A. Da Fonseca, and J. Kent. 2000. Biodiversity  
621 hotspots for conservation priorities. *Nature* 403:853–858.
- 622 Narwani, A., M. A. Alexandrou, T. H. Oakley, I. T. Carroll, and B. J. Cardinale. 2013. Experimental  
623 evidence that evolutionary relatedness does not affect the ecological mechanisms of coexistence in  
624 freshwater green algae. *Ecology Letters* 16:1373–1381.
- 625 Ocampo-Ariza, C., J. L. Bufford, P. E. Hulme, P. D. Champion, and W. Godsoe. 2018. Strong fitness  
626 differences impede coexistence between an alien water fern (*Azolla pinnata* r. br.) and its native  
627 congener (*Azolla rubra* r. br.) in New Zealand. *Biological Invasions* pages 1–9.
- 628 Petermann, J. S., A. J. Fergus, L. A. Turnbull, and B. Schmid. 2008. Janzen-connell effects are widespread  
629 and strong enough to maintain diversity in grasslands. *Ecology* 89:2399–2406.
- 630 Saavedra, S., R. P. Rohr, J. Bascompte, O. Godoy, N. J. Kraft, and J. M. Levine. 2017. A structural  
631 approach for understanding multispecies coexistence. *Ecological Monographs* .

- 632 Seabloom, E. W., W. S. Harpole, O. Reichman, and D. Tilman. 2003. Invasion, competitive domi-  
633 nance, and resource use by exotic and native California grassland species. *Proceedings of the National*  
634 *Academy of Sciences* 100:13384–13389.
- 635 Soliveres, S., F. T. Maestre, W. Ulrich, P. Manning, S. Boch, M. A. Bowker, D. Prati, M. Delgado-  
636 Baquerizo, J. L. Quero, I. Schöning, et al. 2015. Intransitive competition is widespread in plant  
637 communities and maintains their species richness. *Ecology letters* 18:790–798.
- 638 Spear, E. R., and E. A. Mordecai. 2018. Foliar pathogens of California grasses are multi-host and spatially  
639 widespread: implications for grassland diversity. *Ecology (in press)*.
- 640 Staver, A. C., S. Archibald, and S. A. Levin. 2011. The global extent and determinants of savanna and  
641 forest as alternative biome states. *Science* 334:230–232.
- 642 Stouffer, D. B., C. E. Wainwright, T. Flanagan, and M. M. Mayfield. 2018. Cyclic population dynamics  
643 and density-dependent intransitivity as pathways to coexistence between co-occurring annual plants.  
644 *Journal of Ecology* 106:838–851.
- 645 Stromberg, M. R., and J. R. Griffin. 1996. Long-term patterns in coastal California grasslands in relation  
646 to cultivation, gophers, and grazing. *Ecological Applications* 6:1189–1211.
- 647 Tilman, D. 1980. Resources: a graphical-mechanistic approach to competition and predation. *The*  
648 *American Naturalist* 116:362–393.
- 649 Turelli, M. 1978. Does environmental variability limit niche overlap? *Proceedings of the National*  
650 *Academy of Sciences* 75:5085–5089.
- 651 Turnbull, L. A., L. Manley, and M. Rees. 2005. Niches, rather than neutrality, structure a grassland  
652 pioneer guild. *Proceedings of the Royal Society of London B: Biological Sciences* 272:1357–1364.
- 653 Usinowicz, J., C.-H. Chang-Yang, Y.-Y. Chen, J. S. Clark, C. Fletcher, N. C. Garwood, Z. Hao, J. John-  
654 stone, Y. Lin, M. R. Metz, et al. 2017. Temporal coexistence mechanisms contribute to the latitudinal  
655 gradient in forest diversity. *Nature* 550:105.
- 656 Vannette, R. L., and T. Fukami. 2014. Historical contingency in species interactions: towards niche-based  
657 predictions. *Ecology Letters* 17:115–124.
- 658 Warner, R. R., and P. L. Chesson. 1985. Coexistence mediated by recruitment fluctuations: a field guide  
659 to the storage effect. *The American Naturalist* 125:769–787.

660 **Figures**

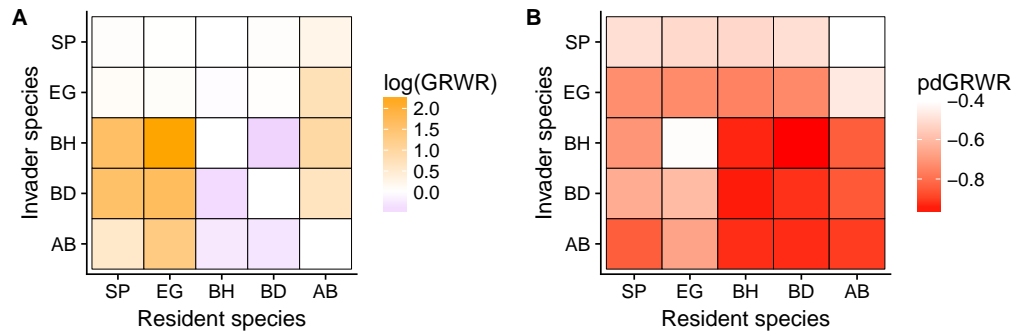

Figure 1: Strength of pairwise competition inferred from the growth rates of invaders introduced at low density to established monocultures of residents. A: log of growth rate when rare (GRWR) –  $\log(\text{GRWR}) > 0$  is the invasion criterion. Larger positive values (darker yellow/orange) represent high niche overlap, while darker purple represents less overlap. B: shows the proportional difference in each species growth rate in the presence of the resident species as compared to its growth rate in the absence of competition. p. (Abbreviations: perennial native species (*S. pulchra* (SP), *E. glaucus* (EG)), annual exotic species (*A. barbata* (AB), *B. hordeaceus* (BH), and *B. diandrus* (BD))).

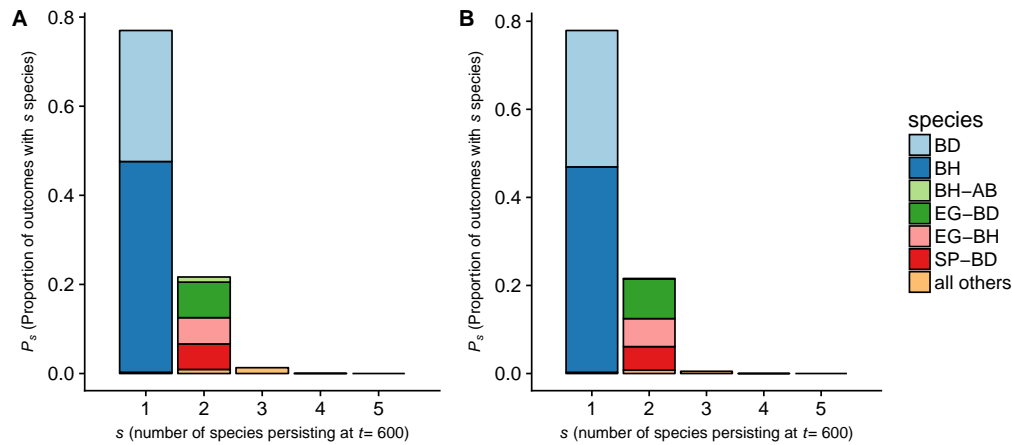

Figure 2: The proportion of outcomes in which a given species or species combination persisted after 600 generations in the population dynamic model. Each replicate represents a single sample from the posterior distribution of the model parameters, and initial competitor densities from a randomly sampled transect from among the set of transects that we measured. The x-axis corresponds to the number of species ( $s$ ) that persisted over 600 simulated years, while the y-axis corresponds to the proportion of replicates ( $P_s$ ) that resulted in this outcome. Each bar is subdivided into the specific set of species that were observed to have  $\log(\text{GRWR}) > 0$  for a particular parameter set and transect sample. All compositions that occurred in under 1% of replicates are grouped into a single color. A: results from a model that includes foliar fungal infection but not BFOD; B: results from the model that includes both foliar fungal infection and BFOD. (Abbreviations: perennial native species (*S. pulchra* (SP), *E. glaucus* (EG)), annual exotic species (*A. barbata* (AB), *B. hordeaceus* (BH), and *B. diandrus* (BD))).



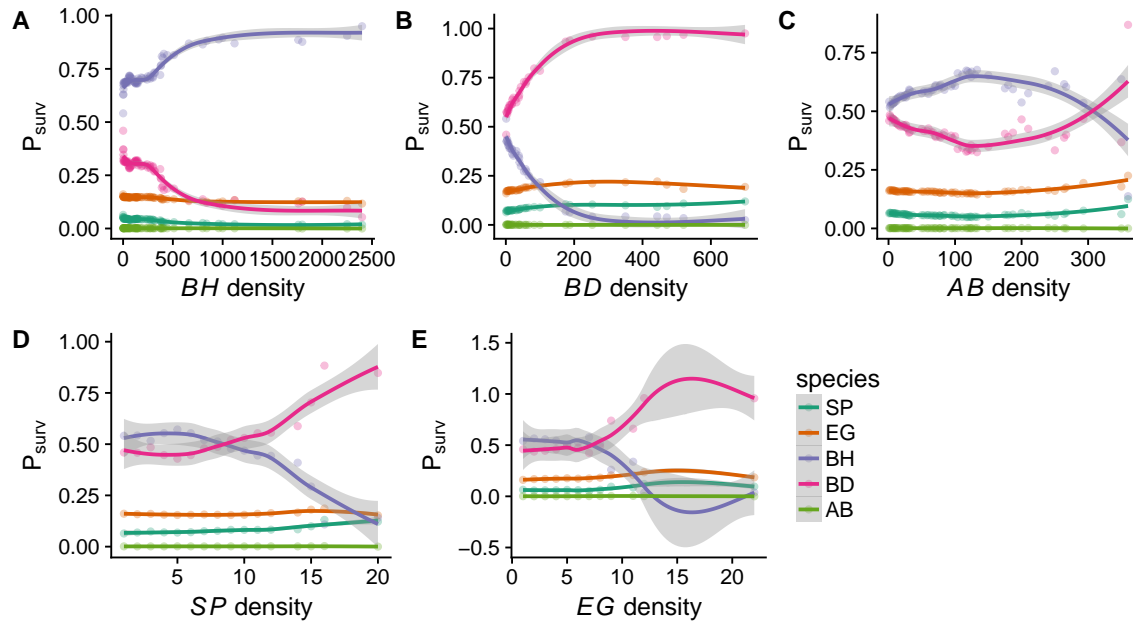

Figure 3: Effect of initial conditions on the outcome of competition. Estimated probability of persistence ( $P_{\text{surv}}$ ) of each species (colored points and lines) as a function of initial density of each species in the simulation (x-axis). Points represent the proportion of simulations resulting in persistence that were initialized at the corresponding density, while loess curves (and gray uncertainty envelopes) were fit with the function `geom_smooth` in `ggplot`. (Abbreviations: perennial native species (*S. pulchra* (SP), *E. glaucus* (EG)), annual exotic species (*A. barbata* (AB), *B. hordeaceus* (BH), and *B. diandrus* (BD))). Priority effects occur when the probability of persistence depends strongly on initial density.

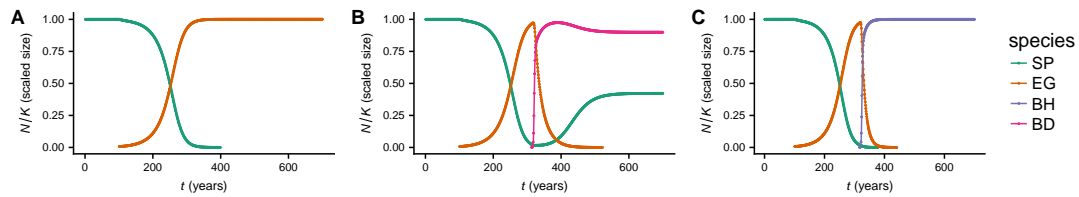

Figure 4: Effect of exotic annuals on invasion dynamics. A-C correspond to a single set of parameter estimates sampled from the posterior distribution. A: *EG* invades at  $t = 100$ , and is able to establish and eventually replace *SP*. B: *EG* invades at  $t = 100$ , and is able to establish and gradually replace *SP*. *BD* invades at  $t = 220$ , and coexists with *SP*, reversing the invasion of *EG* and preventing *EG* and *BH* from invading in the future. C: *EG* invades at  $t = 100$ , and is able to establish and gradually replace *SP*. *BH* invades at  $t = 220$ , and out-competes both perennials. *BD* cannot invade due to the priority effect between *BD* and *BH*. Units on the y-axis correspond to population sizes relative to monoculture density (Abbreviations: perennial native species (*S. pulchra* (SP), *E. glaucus* (EG)), annual exotic species (*B. hordeaceus* (BH), and *B. diandrus* (BD))).

| Parameters & variables | Description                                                       |
|------------------------|-------------------------------------------------------------------|
| $\alpha_{jl}$          | per-capita competition impact of species $l$ on species $j$       |
| $\beta_j$              | impact of foliar fungal infection per unit area infected          |
| $A_j$                  | mean leaf area infected                                           |
| $\lambda_j$            | mean seed output in the absence of infection and competition      |
| $f_j(t)$               | compound impact of competition and infection on seed output       |
| $S_j$                  | seed output after accounting for competition and infection        |
| $g_j$                  | germination fraction                                              |
| $\gamma_j$             | seed survival rate in presence of BFOD pathogen                   |
| $\nu_j$                | seedling survival rate                                            |
| $\phi_j^I$             | establishment probability for infected seedlings                  |
| $\phi_j^U$             | establishment probability for un-infected seedlings               |
| $D_l$                  | density of competitor species $l$ per $m^2$                       |
| $\nu_j^0$              | seedling transition rate in the absence of competition            |
| $\nu_j(t)$             | seedling transition rate after accounting for competition         |
| $\alpha_s$             | impact of seedlings on seedling-adult transition                  |
| $\alpha_a$             | impact of perennials on seedling-adult transition                 |
| $\alpha_n$             | impact of exotic annuals on seedling-adult transition             |
| $D_s$                  | density of seedlings per $m^2$                                    |
| $D_a$                  | density of exotic annuals per $m^2$                               |
| $D_n$                  | density of perennials per $m^2$                                   |
| $P_j^I$                | proportion of seedlings infected during seedling-adult transition |
| $\xi_j$                | rate of perennial adult over-summer survival                      |
| $n_j^a(t)$             | number of annual seeds at time $t$                                |
| $n_j^p(t)$             | number of perennial seeds at time $t$                             |
| $a_j(t)$               | number of perennial adults at time $t$                            |

Table 1: Descriptions of parameters and variables that are relevant to our population dynamic model. Where not otherwise specified,  $j$  subscript refers to species  $j$ .

## Supplemental methods & figures

### Competition experiment

To measure the impact of intra- and interspecific competition on seed production, we set up an experiment to vary the density of each plant species in monoculture and measured its per-capita impact on seed production for each competitor species (Mordecai, 2013; Levine and HilleRisLambers, 2009). We attempted to limit the seed bank by preventing seed set the year prior to the experiment. In the spring of 2015 before seed set, we laid down weed matting across a 35m x 35m area near the Sun Field Station in Jasper Ridge Biological Preserve. We cut holes in the matting to allow existing adult perennial plants (mostly *S. pulchra*) to survive. In fall 2015 before the first major rains, we removed the weed matting and established 210 1-m<sup>2</sup> competition plots and 30 4-m<sup>2</sup> competition-free plots. All plots had a 1-m untreated buffer area from all other plots on all sides.

We manipulated background competitor species density and fungal abundance in a factorial design. The competition plots were randomly assigned to treatments across five densities, seven background “species-groups” (*Avena barbata*, *Bromus diandrus*, *Bromus hordeaceus*, *Elymus glaucus* seedlings, *E. glaucus* adults, *Stipa pulchra* seedlings, and *S. pulchra* adults), and three fungal manipulations (fungicide, water controls, or fungal inoculation with liquid inoculum). Because the fungal inoculum was not successful in increasing fungal infection and fungicide only modestly reduced fungal load, we pooled all three treatments into a single dataset, and we do not describe fungal growth, inoculation, and fungicide methods here. In total there were two replicate plots of each background species x density x fungal treatment. We additionally established competition-free plots that aimed to have a single individual of each of the seven focal species-groups growing in the absence of competition with all other plants removed from the 2m x 2m plot area.

In the competition plots we sought to create a gradient of densities with each species-group as the ‘background’ species that comprised the dominant competitor environment, plus each remaining species-group present in low density to gauge the impact of the competitor environment on per-capita seed production for each species. Background competitor densities aimed for 10%, 20%, 40%, 80%, and 100% of the density of each plant species in monoculture, where monoculture densities were estimated by counting plants m<sup>-2</sup> in the surrounding area. Monoculture densities were estimated at 10 adults m<sup>-2</sup> for each of the two perennial species, 1,715 seeds m<sup>-2</sup> for *A. barbata*, 3,209 seeds m<sup>-2</sup> for *B. diandrus*, 12,544 seeds m<sup>-2</sup> for *B. hordeaceus*, 4,585 seeds m<sup>-2</sup> for *E. glaucus*, and 1,466 seeds m<sup>-2</sup> for *S. pulchra*. In November, 2015, we added seeds and transplanted adult *S. pulchra* plants to achieve the desired density treatment in each plot, removing excess bunchgrasses from plots as needed. We transplanted adult *E. glaucus* plants from an area 1 km away into the plots in December, 2015. All transplants were watered to settle the soil. We then added approximately 10 seeds of each non-background species in January, 2016, marked with plastic cutlery stuck into the ground, and one adult of each perennial species, marked with a small plastic ring, to each plot to ensure that all focal species were represented in each plot. These would become the focal individuals on which we would assess seed production. In the competition-free plots we seeded approximately 10 seeds/species into separate locations within the 2m x 2m plots, each marked by plastic cutlery, plus one individual adult of each perennial species, marked by plastic rings. Finally, we reseeded 18 of the 240 plots with 75-100% of their original treatment seed weight in January, 2016 following low germination.

In addition to applying weed matting to prevent seed set the prior year, we weeded the plots extensively to remove target and non-target species and to thin plots to the desired density. However, despite these efforts a substantial density of non-target plants naturally recruited into the plots. As a result, although the experiment manipulated competitor density, it did not achieve the predetermined plant density targets. For this reason, we censused plant density and species at peak flowering in the spring, and used these actual competitor density estimates as inputs into all competition models.

709 We attempted to harvest seeds from all marked focal individuals in all plots in May-June 2016 when  
710 they matured but before they dehisced and dispersed. Because the seeds of *A. barbata* and *S. pulchra*  
711 dehisced very quickly at maturity and the timing varied within an individual, we harvested and counted  
712 the glumes of those individuals and estimated the number of seeds per glume to get an overall estimate  
713 of seed production (two seeds per glume for *A. barbata* and one seed per glume for *S. pulchra*).

## 714 Transect plots

715 We also measured the impacts of competition on seed production in plots that naturally varied in plant  
716 composition, to understand the strength of competition in established plant communities. In the 2015  
717 growing season, we set up six transects in the area surrounding the Sun Field Station at Jasper Ridge  
718 Biological Preserve. Each transect varied in grass composition from native perennial-dominated at one  
719 end to exotic annual-dominated at the other, with five 1-m<sup>-2</sup> plots spanning each transect spaced ap-  
720 proximately 5-10m apart. Individual plots were placed based on desired plant community compositions,  
721 thus plots were unevenly spaced (3 to 18m apart). Transects ranged from 20m to 50m in length. Three of  
722 the transects were dominated by *S. pulchra* at the perennial end, and the other three were dominated by  
723 *E. glaucus*. We surveyed plant density and community composition in the 2015 growing season. In 2016  
724 we returned to these transects and used only the first, third, and fifth plot in each transect, representing  
725 perennial-dominated, intermediate, and annual-dominated plots, respectively. We paired each plot with  
726 two additional 1-m<sup>2</sup> plots next to each original plot that were visually similar in composition, for a total  
727 of three sets of triplet plots per transect. In each triplet of plots, one received fungicide, one received  
728 a water control, and one received fungal inoculum. Again, the fungal inoculation was not successful at  
729 increasing pathogen infection, and fungicide only modestly decreased pathogen load, so we combined  
730 data from all treatments. We seeded approximately 20 seeds of each focal species, and transplanted an  
731 adult *S. pulchra* and/or an adult *E. glaucus* plant into each plot that lacked these species (seeding and  
732 transplanting were done on the same days as the competition plots described above). We censused the  
733 density of each plant species during peak flowering (when grasses are easiest to identify), then harvested  
734 all seeds from up to three individuals of each focal species present in each plot. We used data on the  
735 number of seeds per individual and competitor density to parameterize competition models, as described  
736 below.

## 737 Competition & infection model

738 We use a simple model of competition between individuals on a patch, in which seed output  $S$  is affected  
739 by the density of competing individuals and infection burden. Since we observe that  $S$  has an over-  
740 dispersed distribution that is well described by a negative binomial (Fig. S4), we allow  $S$  to follow a  
741 negative binomial distribution.

$$P(S|r, p) = \frac{\Gamma[S + r]}{\Gamma[S + 1]\Gamma[r]} (1 - p)^r p^S, \quad (10)$$

742 where  $\Gamma$  is the gamma function, and  $p$  and  $r$  are parameters that govern the mean and variance of the  
743 negative binomial distribution. We suppose that the expected fitness  $f$  of individual  $i$  in species  $j$  is a  
744 function of the number of individuals competing in the patch, and the amount of infected leaf tissue of  
745 each individual such that

$$f_{ij} = \frac{1}{1 + (\sum_l \alpha_{jl} D_l) + A_{ij} \beta_j} \quad (11)$$

746 where  $D_l$  is the density of individuals of species  $l$ , and  $\alpha_{jl}$  captures the strength of the impact of individuals  
747 of species  $l$  on  $j$  ( $\vec{\alpha}_j$  is the vector of  $\alpha_{jl}$  values).  $A_{ij}$  is the area of infected leaf tissue of individual  
748  $i$ , and  $\beta_j$  is the impact of foliar fungal infection per unit leaf area infected on fitness for individuals

749 of species  $j$ . We constrain the  $\vec{\alpha}$  and  $\beta$  values to be non-negative, which captures our strong prior  
750 expectation that interactions between species and infection should have a deleterious effect on fitness.  
751 This competition model was previously studied in other systems (Mayfield and Stouffer, 2017). We  
752 incorporate the competition model into seed output  $S$  by allowing the mean of the negative binomial  
753 distribution to follow eqn. 11, while preserving the shape of the negative binomial. To do so, we allow  
754 the  $r$  parameter of the negative binomial to be given by

$$r = r_0 f_{ij}, \quad (12)$$

755 where  $r_0$  is the  $r$  parameter in the absence of competition and infection. This model formulation constrains  
756 the mean seed output to be decreased proportional to the plant's competitive fitness  $f_{ij}$  given its local  
757 competitors and its infection burden. Hence, the full likelihood of the observed seed output  $S$  given  
758 competitor density is

$$P(S|r_0, p, \vec{\alpha}_j, \beta_j) = \frac{\Gamma[S + r_0 f(\vec{\alpha}_j, \beta_j)]}{\Gamma[S + 1] \Gamma[r_0 f(\vec{\alpha}_j, \beta_j)]} (1 - p)^{r_0 f(\vec{\alpha}_j, \beta_j)} p^S. \quad (13)$$

## 759 Estimating competition and foliar infection parameters

760 We wrote custom MCMC software in Python to perform parameter estimation under our model of  
761 competition and infection within a growing season. We suppose that the data correspond to a vector of  
762 observed seed outputs, competitor densities, and leaf-area infected for each plant, and we seek to infer each  
763 of the  $\alpha$  and  $\beta$  parameters with this method. Our software implements a standard Metropolis-Hastings  
764 algorithm. We compute the likelihood function with eqn. 13, and apply an uninformative  $\Gamma$ -shaped prior  
765 on  $\vec{\alpha}$  and  $\beta$  such that these parameters are constrained to be non-negative. We thinned the observed  
766 MCMC traces such that we do not observe strong autocorrelations. We performed 20 independent MCMC  
767 runs for each focal species, and found nearly identical parameter estimates across independent runs. Our  
768 software is freely available by request and will be posted on the web at a future date.

769 To assess the performance of our MCMC-based inferences, we performed simulations of seed output  
770 under our model and assessed our ability to recapture the parameters that were used to generate the  
771 simulated data. For each simulation, we selected a focal plant species  $j$  and randomly selected competition  
772 parameters ( $\vec{\alpha}_j$ ) and infection parameters ( $\beta_j$ ) from uniform priors. We then selected the  $p$  and  $r_0$   
773 parameters such that the observed mean seed output would exactly match the expected seed output in  
774 the simulations. For each plant of species  $j$  in our dataset, we then simulated a new seed output based  
775 on the true density of competitors for this plant and the randomly sampled competition and infection  
776 parameters. We then ran our MCMC pipeline on the simulated data, and compared the mean of the  
777 posterior distribution of inferred parameter estimates to the true parameter estimates. We find that our  
778 method is approximately unbiased and reasonably accurate. A subset of the results of this experiment  
779 are plotted in Fig. S5.

780 Having obtained estimates for the full suite of parameters of our model, we sought to compare  
781 predicted seed densities from our model to field observations. For each focal species, we obtained field  
782 estimates of the seed density when grown in monoculture and compared them to simulation-based predic-  
783 tions under our demographic model. For each species  $j$ , we selected a random estimate for the competition  
784 parameters  $\alpha_{jj}$  and infection parameters  $\beta$  as well as estimates of the other relevant parameters by sam-  
785 pling from the inferred posterior distribution of each parameter and then used a forward simulation under  
786 our population dynamic model to obtain an estimate of the final monoculture density. We then compared  
787 this set of predicted monoculture densities to the median estimates obtained from our field observations.  
788 While monoculture density estimates from our model are noisy, they are concordant with and of similar  
789 magnitude to the field estimates (Fig. S6).

## 790 Sensitivity analyses

791 To better understand which demographic parameters are most important for determining the outcome of  
792 competition (*i.e.*, GRWR) for each species, we independently increased each parameter by 5% for each  
793 posterior estimate. For simplicity, for each species, we limited this experiment to the set of parameters  
794 that directly impact its growth (*i.e.*, its own demographic rates: for each species  $j$ , only parameters sub-  
795 scripted with  $j$ ). To further reduce the number of parameters, we simultaneously increased all parameters  
796 pertaining to the impact of competition on perennial transition from seedling to adult (*i.e.*,  $\alpha_a$ ,  $\alpha_n$ , and  
797  $\alpha_s$ ), which we then denote as a composite parameter  $\alpha_{P_T}$ . We included both BFOD infection and fungal  
798 foliar infection for this analysis, although the impact of foliar infection was negligible. We compared the  
799 predicted GRWR for each species with and without the 5% increase and computed the change in GRWR  
800 as  $\Delta\text{GRWR}$ . We report the median  $\Delta\text{GRWR}$  over all posterior samples.

801 The population growth of both perennial species was most sensitive to the over-summer survival of  
802 adult individuals ( $\xi$ ), and essentially insensitive to all other parameters (Fig. S8). *A. barbata* was highly  
803 sensitive to  $\gamma$  (*i.e.*, the proportion of seeds escaping infection by BFOD), which is unsurprising given the  
804 large impact of BFOD on *A. barbata* in the previous analyses and the large burden of infection on *A.*  
805 *barbata* seeds (Fig. S2). *B. diandrus* and *B. hordeaceus* were modestly positively impacted by increasing  
806 the probability of establishment for both infected and uninfected seedlings ( $\phi^i$  and  $\phi^u$ ), and per-capita  
807 seed production,  $\lambda$ , but negatively impacted by increases in  $\gamma$  and interspecific competition with each  
808 other.

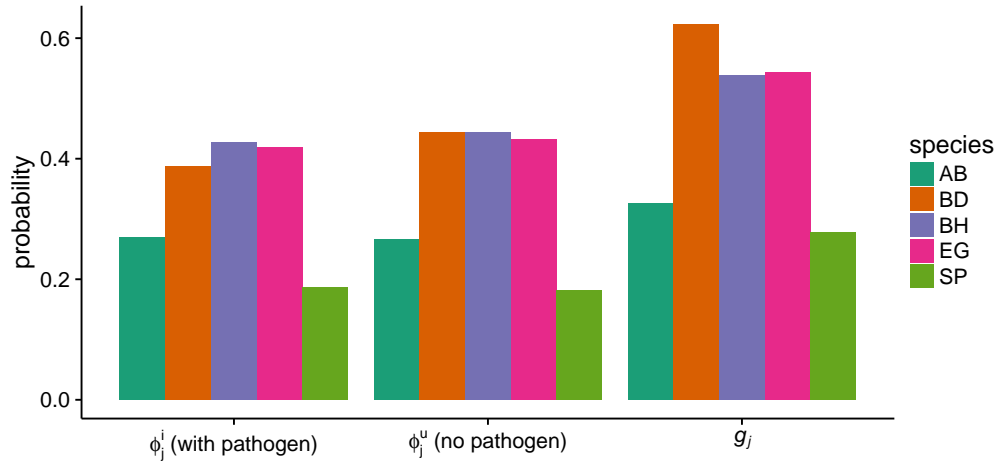

Figure S1: Estimated germination ( $g_j$ ) and establishment ( $\phi_j$ ) probabilities for each species  $j$ . Establishment probability was estimated in the presence and absence of foliar fungal pathogens.



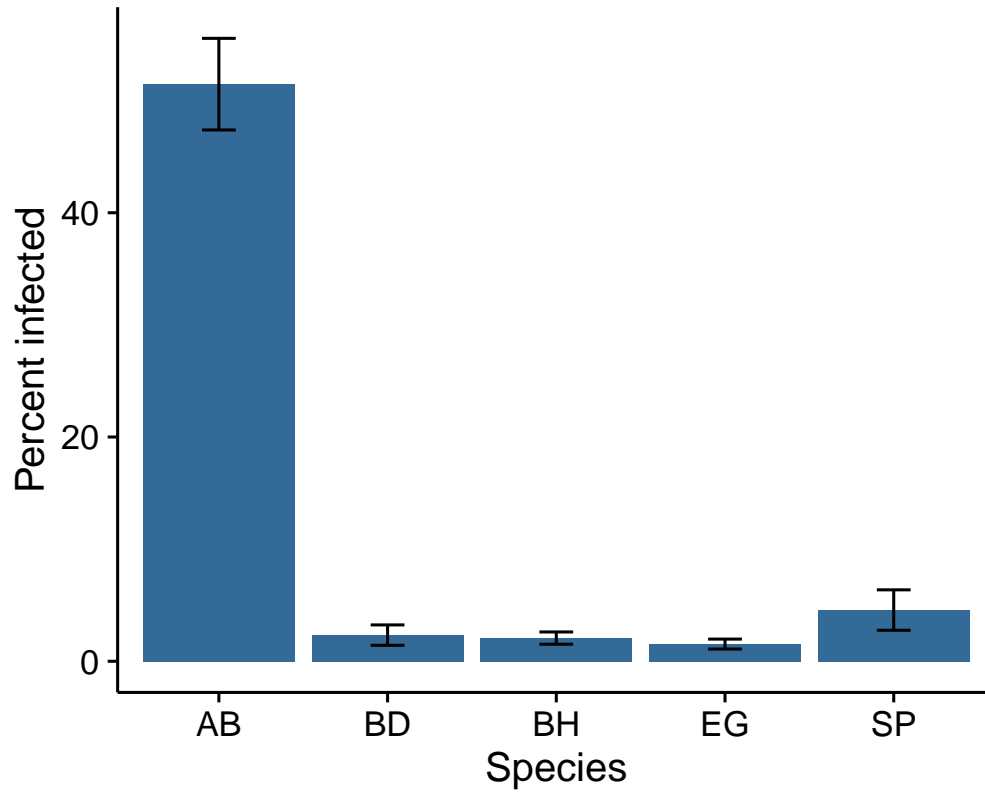

Figure S2: The proportion of seeds that were infected by the Black Fingers of Death pathogen in a seed bag experiment, by species. (Abbreviations: *S. pulchra* (SP), *E. glaucus* (EG), *A. barbata* (AB), *B. hordeaceus* (BH), and *B. diandrus* (BD)).

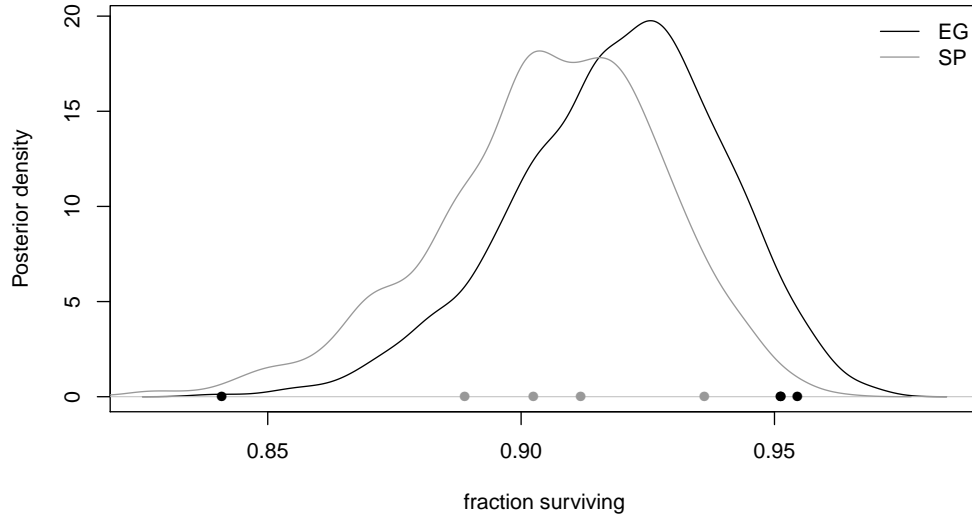

Figure S3: Estimates of the probability of adult perennial over-summer survival rate (which we term  $\xi_j$  in our model). The observed fraction of plants surviving across four sampling sites are plotted as points along the x-axis, while the curves represent the posterior density. (Abbreviations: *S. pulchra* (SP), *E. glaucus* (EG)).

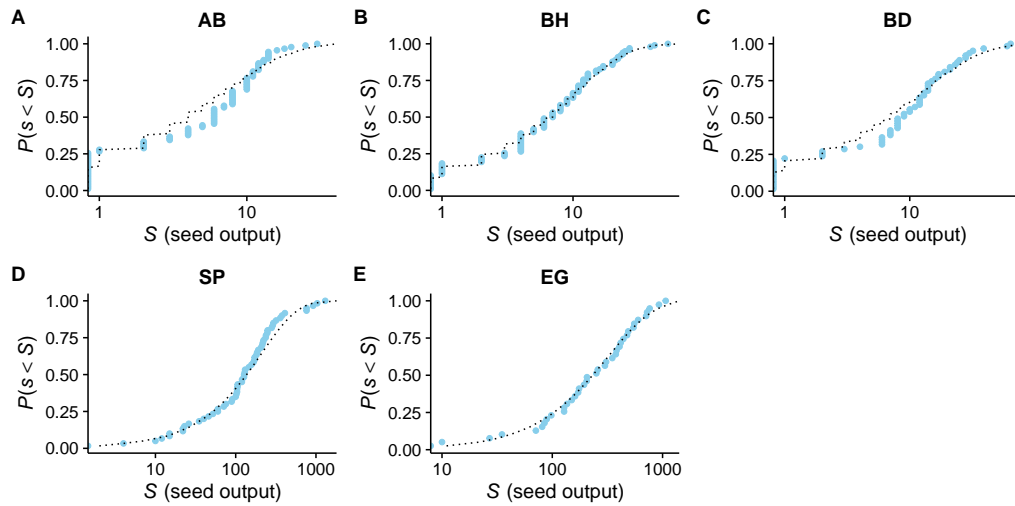

Figure S4: The cumulative distribution of observed seed counts ( $P(s > S)$ ) is plotted as a function of seed count  $S$ . Each point represents the fraction of plants that have a seed count less than  $S$ . The dashed blue lines show the cumulative distribution of the best fitting negative binomial distribution, obtained by maximum likelihood. (Abbreviations: *S. pulchra* (SP), *E. glaucus* (EG), *A. barbata* (AB), *B. hordeaceus* (BH), and *B. diandrus* (BD)).

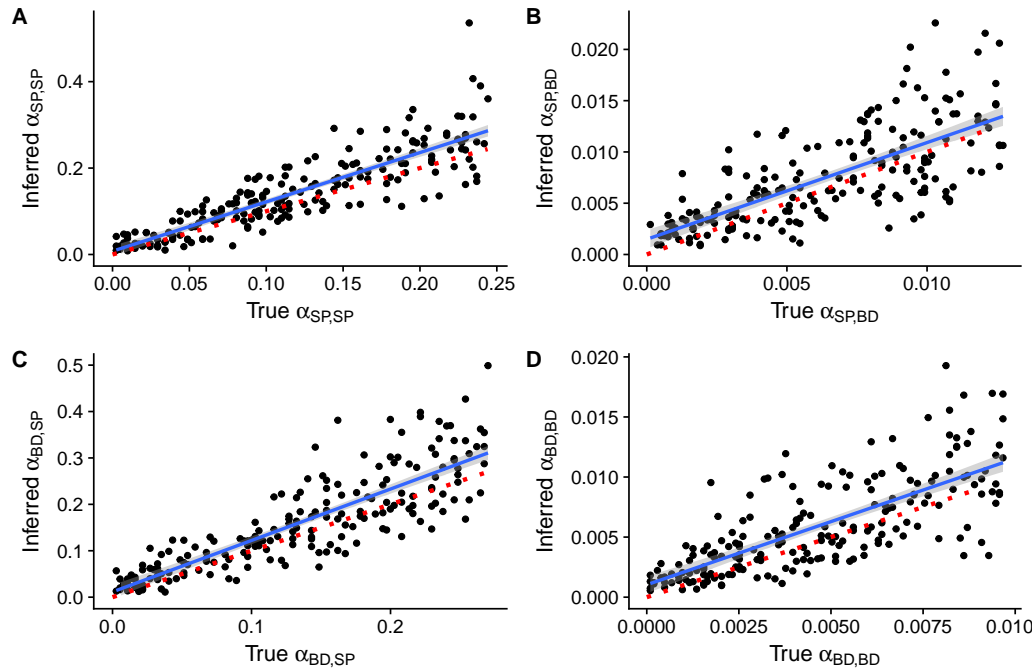

Figure S5: True and inferred parameter values as determined by our MCMC method, as obtained from simulation. The inferred values represent the mean of the inferred posterior distribution. The lines and envelopes (in gray) were fit using a simple linear model of the form  $y = mx + b$  with the method "lm" in the function `geom_smooth` in `ggplot2`, while the red dashed lines show the diagonal (*i.e.*, the expectation if inference were perfect).  $\alpha_{BD,SP}$  is the impact of *S. pulchra* on *B. diandrus*. (Abbreviations: *S. pulchra* (SP) and *B. diandrus* (BD)).

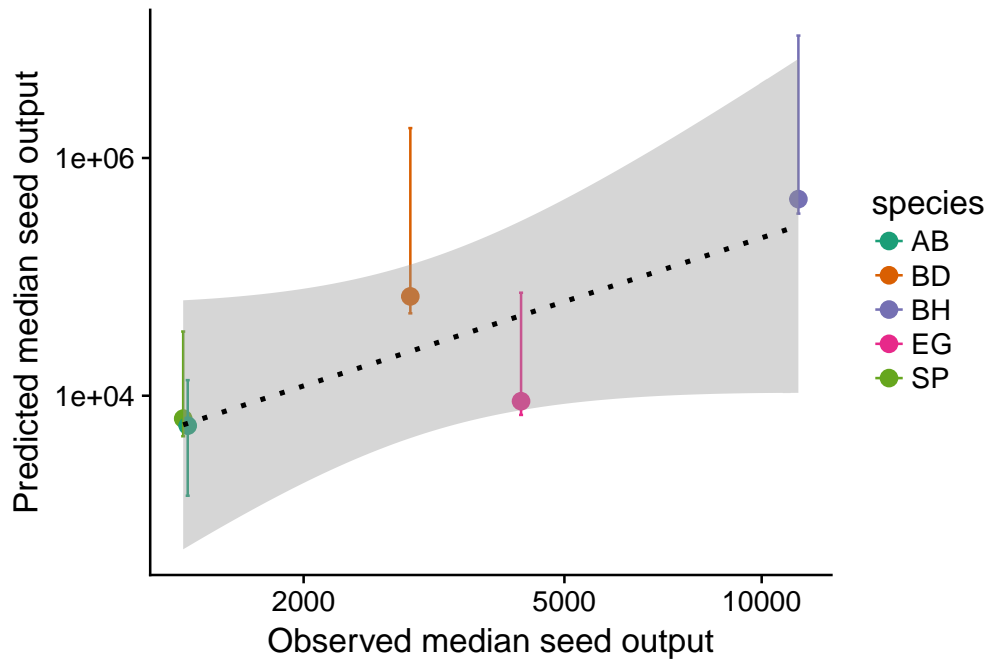

Figure S6: Observed median monoculture seed output densities plotted against those predicted by our population dynamic model. Error bars represent the inner 95% of parameter estimates from our model. The line and envelope (in gray) were fit using a simple linear model of the form  $y = mx + b$  with the method "lm" in the function `geom_smooth` in `ggplot2`. (Abbreviations: *S. pulchra* (SP), *E. glaucus* (EG), *A. barbata* (AB), *B. hordeaceus* (BH), and *B. diandrus* (BD)).

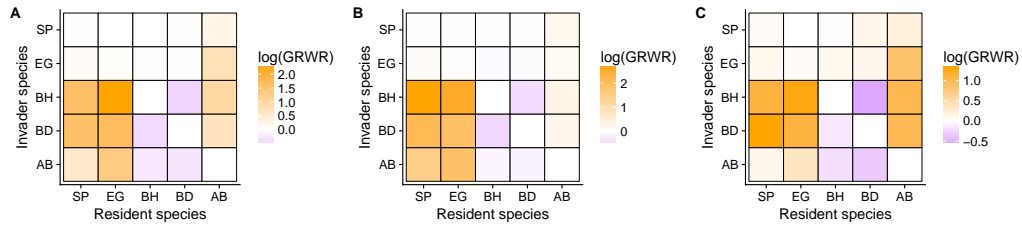

Figure S7: Comparison of pairwise invasion analyses using A: all data (competition plots and transects), B: only the data from the competition experiment, or C: only data from the transects. (Abbreviations: *S. pulchra* (SP), *E. glaucus* (EG), *A. barbata* (AB), *B. hordeaceus* (BH), and *B. diandrus* (BD)).

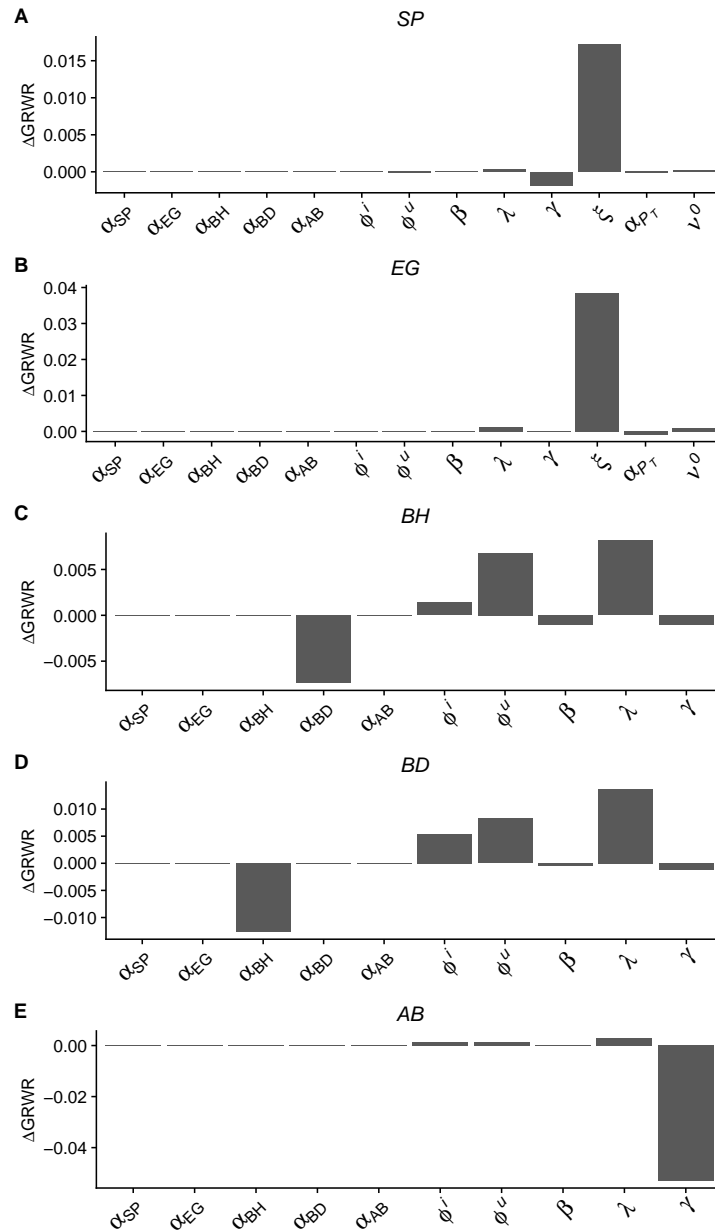

Figure S8: Sensitivity analysis results. For each species, we plot the proportional difference in GRWR when the corresponding parameter is increased by 5%.  $\alpha_{SP}$  denotes the impact of *S. pulchra* on the focal species,  $\alpha_{EG}$  represents the impact of *E. glaucus* on the focal species, etc. Parameters are defined in Table 1. (Abbreviations: perennial native species (*S. pulchra* (SP), *E. glaucus* (EG)), annual exotic species (*A. barbata* (AB), *B. hordeaceus* (BH), and *B. diandrus* (BD))).
